# Supplementary material for: Prognostic Implications of the Residual Tumor Microenvironment after Neoadjuvant Chemotherapy in Triple-Negative Breast Cancer Patients without Pathological Complete Response
Source: MDPI journal article supplement (doi:10.3390/cancers15030597), 2023-01-18

**Supplementary Table S1.** Antibodies and probes used in the immunohistochemical (IHC) and *in situ* hybridization (ISH) analyses (clone, source and dilution).

| Antibody name (dilution)*                      | Dilution clone | Supplier (code)                                             |
|------------------------------------------------|----------------|-------------------------------------------------------------|
| CD4 (RU)                                       | 4B12           | Dako, Santa Clara, CA, USA (IR649)                          |
| CD8 (RU)                                       | C8/144B        | Dako, Santa Clara, CA, USA (IR623)                          |
| FOXP3                                          | 236A/E7        | CNIO, Madrid, Spain                                         |
| CD57 (1:20)                                    | NK1            | Thermo Fisher Scientific, Waltham, MA, USA (Zymed-18-0167Z) |
| CD68 (RU)                                      | KP1            | Dako, Santa Clara, CA, USA (IR609)                          |
| CD1a (RU)                                      | 010            | Dako, Santa Clara, CA, USA (IR069)                          |
| CD21 (RU)                                      | 1F8            | Dako, Santa Clara, CA, USA (IR608)                          |
| CD83 (1:20)                                    | 1H4b           | LEICA-Novocastra (NCL-CD83)                                 |
| CD34 class II (RU)                             | QBEnd/10       | Dako, Santa Clara, CA, USA (FLEX IR632)                     |
| CD31 (RU)                                      | JC70A          | Dako, Santa Clara, CA, USA (FLEX IR610)                     |
| CD15 (1:50)                                    | CARB-3         | Dako, Santa Clara, CA, USA (IR 062)                         |
| HLA-Dr (1 :100)                                | TAL.1B5        | Dako, Santa Clara, CA, USA (M-0746)                         |
| CD138 (RU)                                     | MI15           | Dako, Santa Clara, CA, USA (IR642)                          |
| Target molecules                               | Probe name     | Supplier (code)                                             |
| CXCL13                                         | NM_006419      | Affymetrix, Inc., Santa Clara, CA (VA1-15914)               |
| IL6 (interferon, beta 2)                       | NM_000600      | Affymetrix, Inc., Santa Clara, CA (VA1-13526)               |
| IL10                                           | NM_000572      | Affymetrix, Inc., Santa Clara, CA (VA1-10840)               |
| IL15                                           | NM_000585      | Affymetrix, Inc., Santa Clara, CA (VA1-12546)               |
| MMP1                                           | NM_002421      | Affymetrix, Inc., Santa Clara, CA (VA1-10114)               |
| MMP9                                           | NM_004994      | Affymetrix, Inc., Santa Clara, CA (VA1-16679)               |
| MMP12                                          | NM_002426      | Affymetrix, Inc., Santa Clara, CA (VA1-17343)               |
| MUC1                                           | NM_002456      | Affymetrix, Inc., Santa Clara, CA (VA1-14606)               |
| TNF- $\alpha$                                  | NM_000594      | Affymetrix, Inc., Santa Clara, CA (VA1-10481)               |
| NOTE. * all mouse monoclonal, RU: ready-to-use |                |                                                             |

**Figure S1.** Representative tissue microarray (TMA) stained tumor sections of the 22 tumor microenvironment (TME) markers studied. Cell markers were analyzed by immunohistochemistry (IHC): CD4, CD8, FOXP3, CD57, CD68, CD15, CD21, CD1a, CD83, HLA-DR, CD31, CD34 and CD138; genetic markers were analyzed by chromogenic *in situ* hybridization (ISH): CXCL13, IL-6, IL-10, IL-15, MMP1, MMP-9, MMP12, MUC1 and TNF- $\alpha$ .

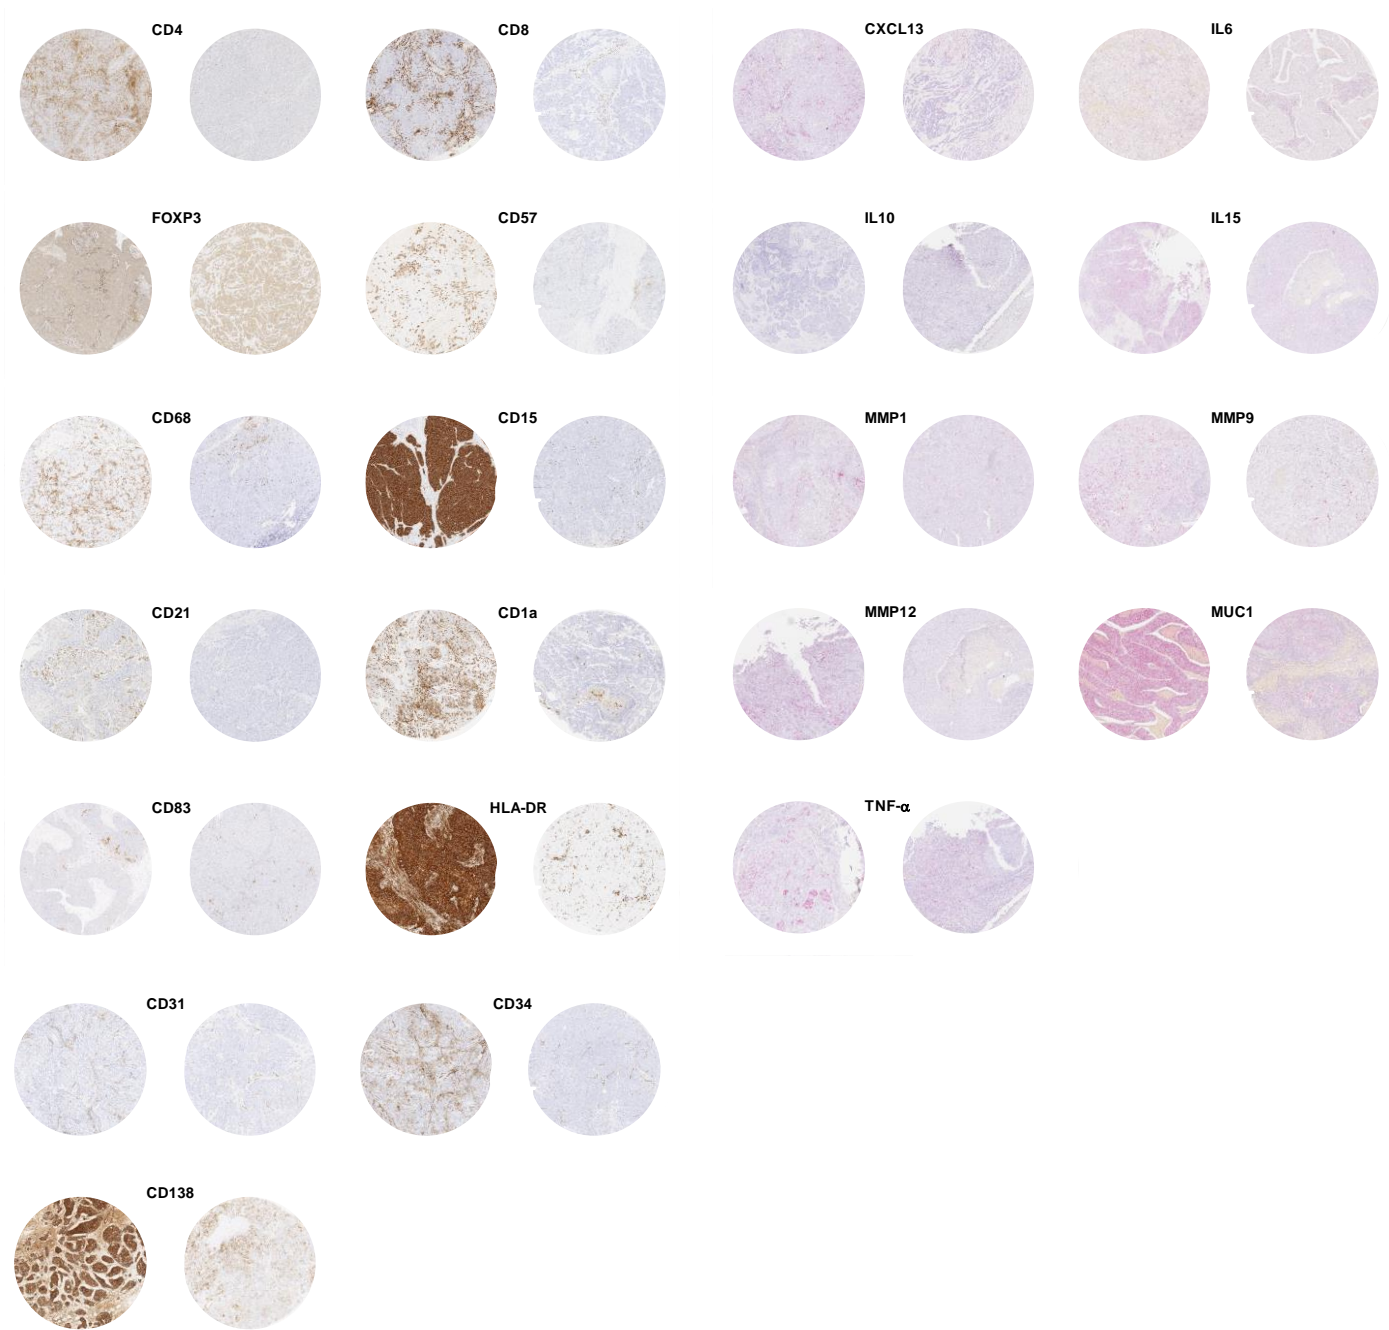

**Figure S2.** Kaplan–Meier analysis of five-year overall survival (OS) among all patients.

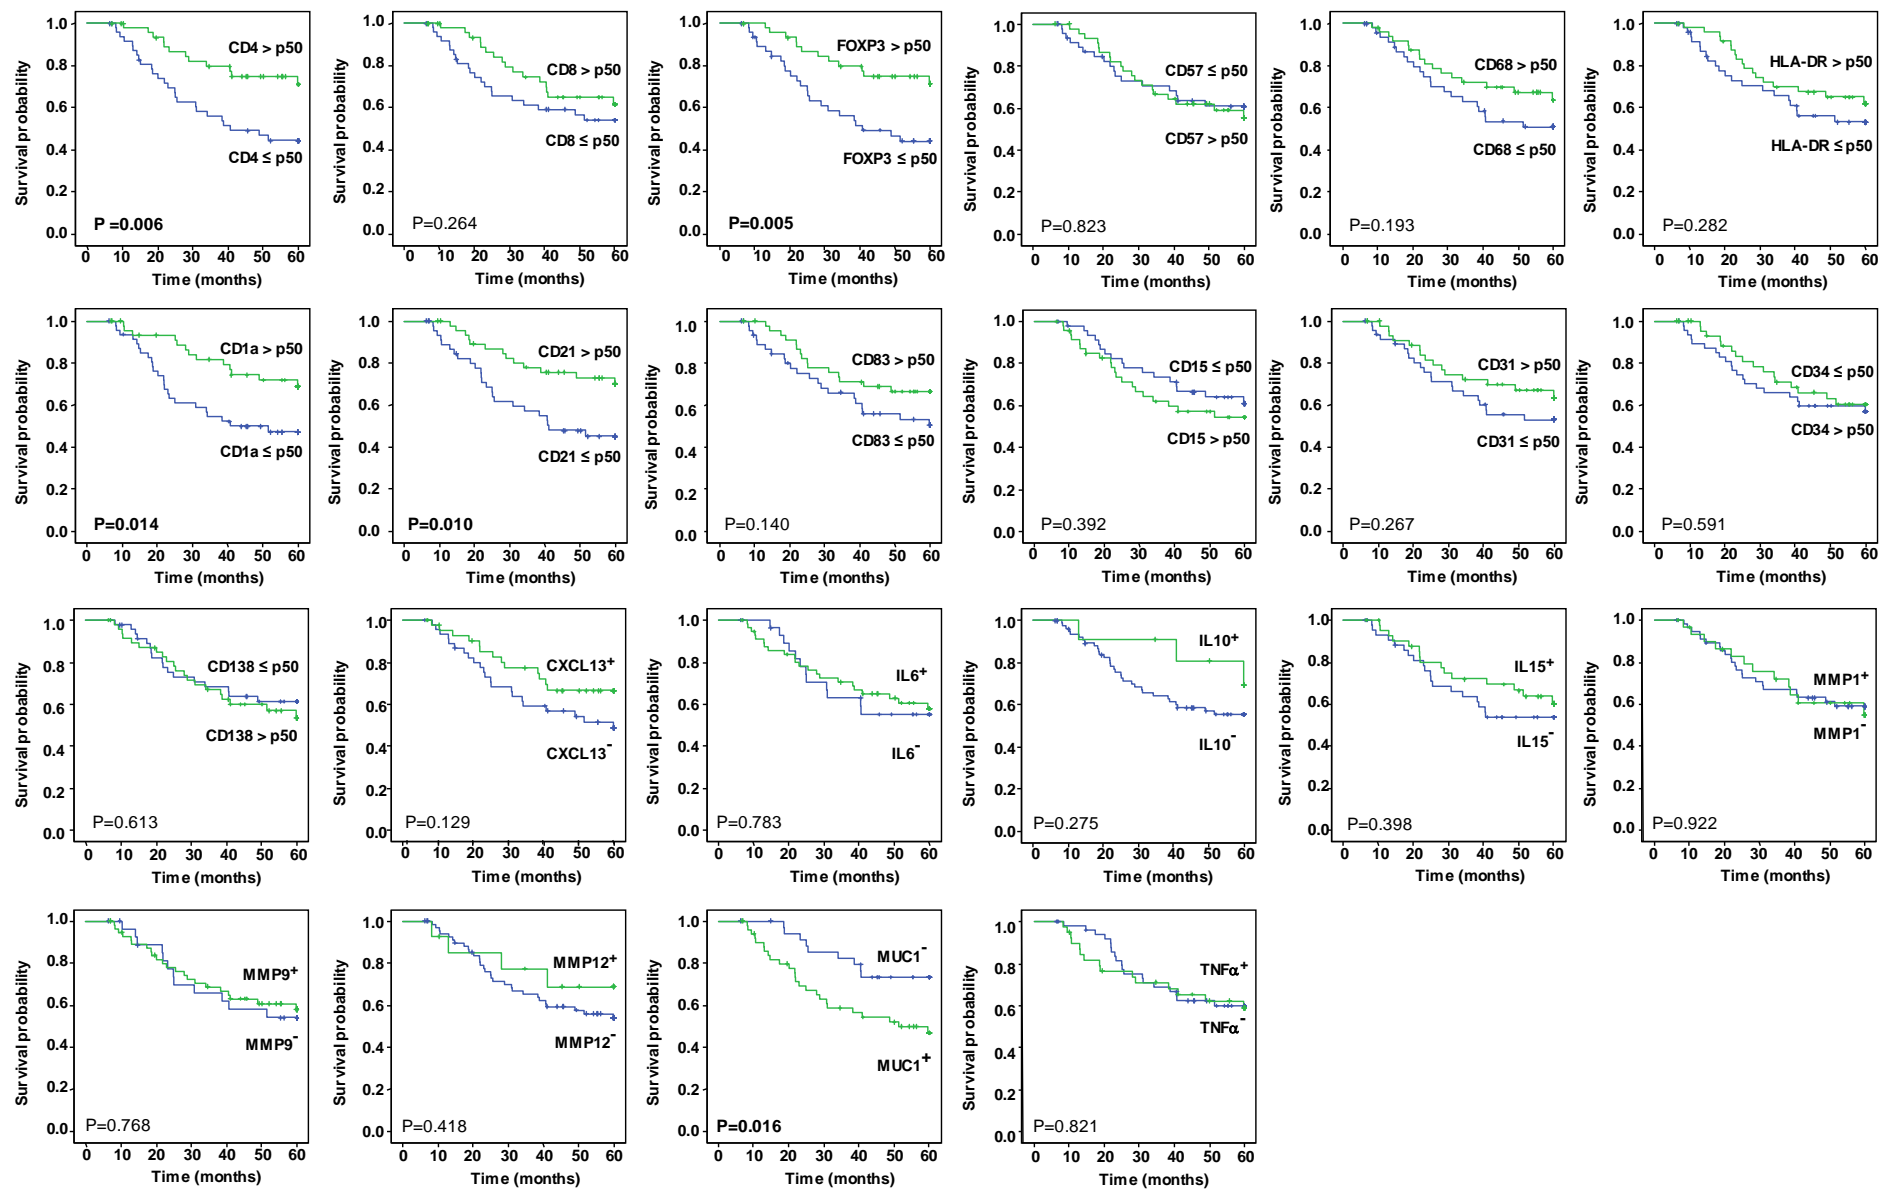

**Figure S3.** Kaplan–Meier analysis of five-year relapse-free survival (RFS) among all patients.

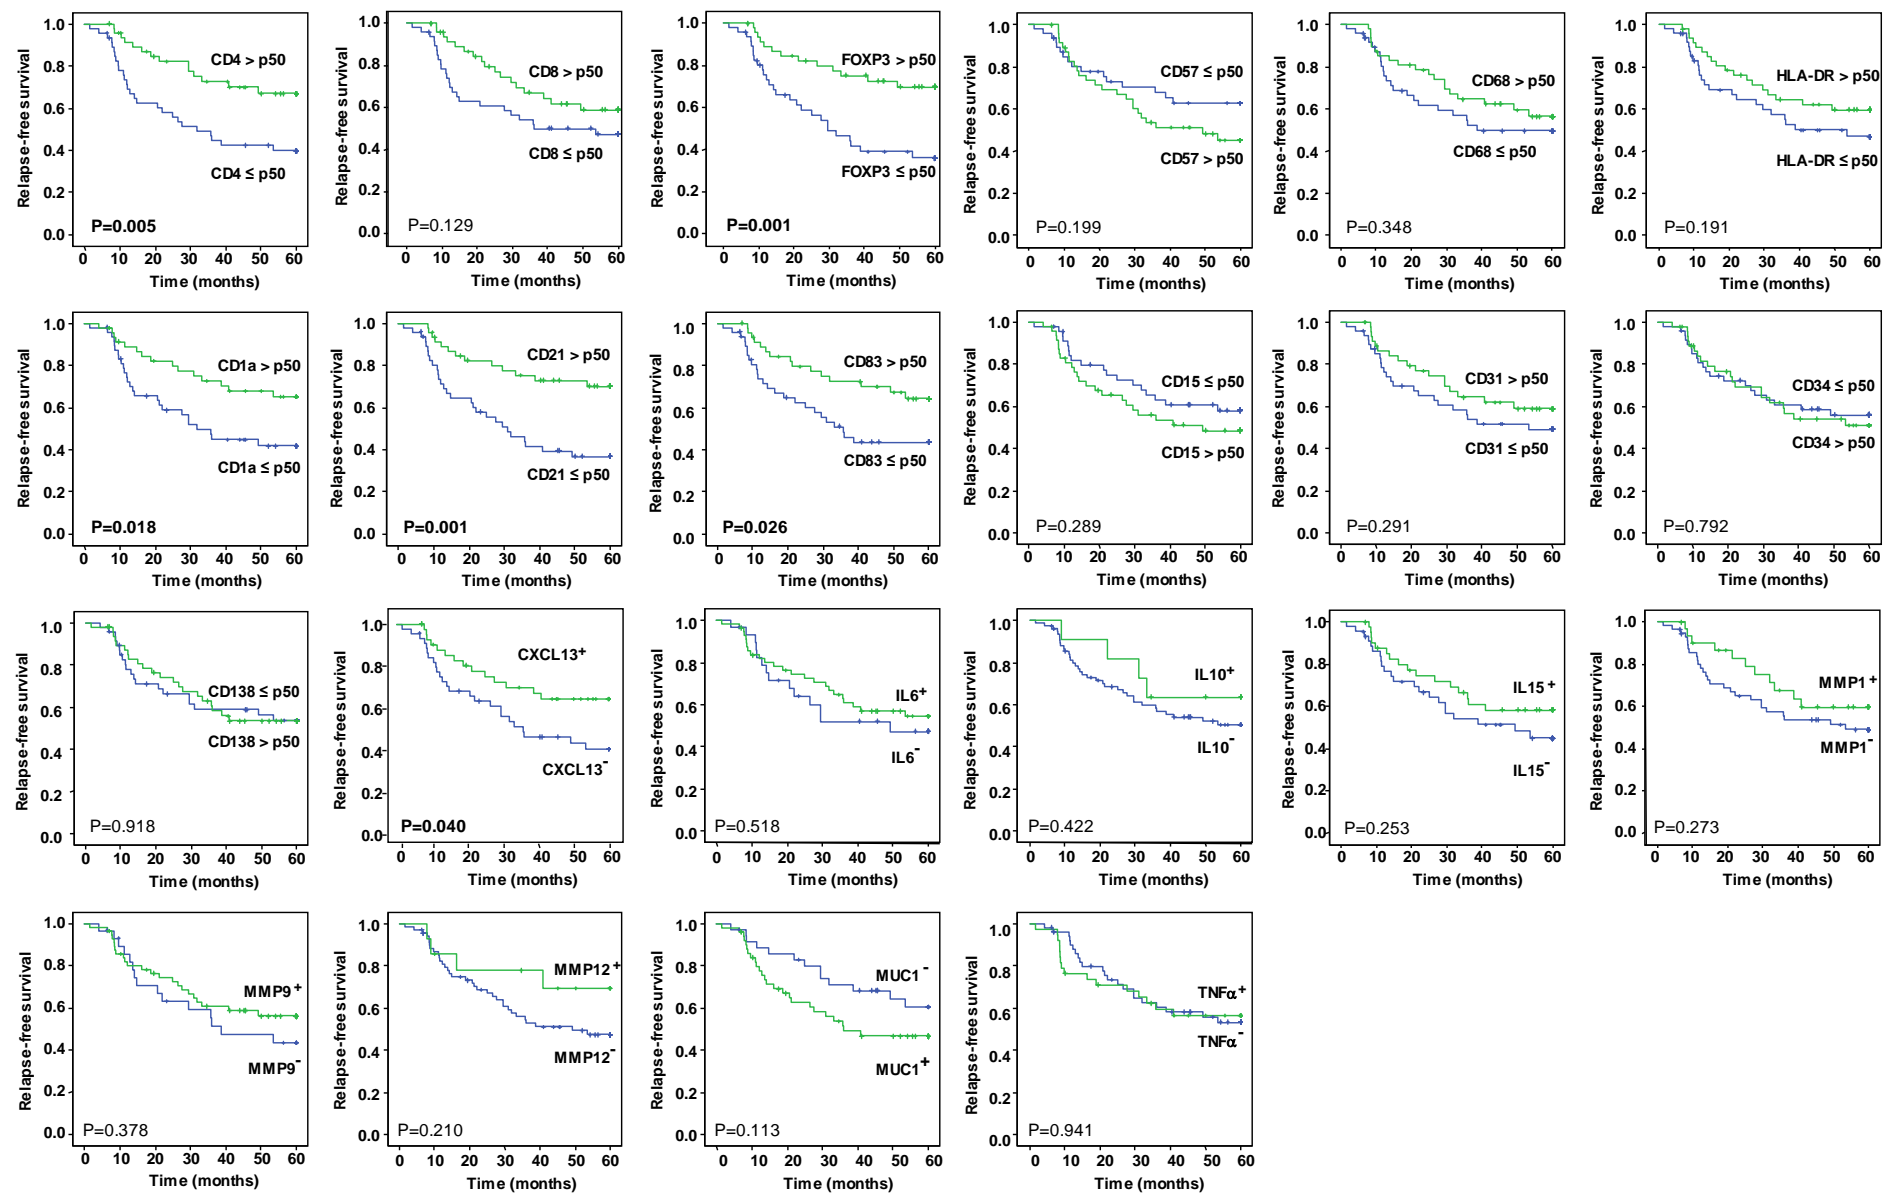

**Figure S4.** Superimposed Kaplan–Meier curves of five-year overall survival (OS) by tumor microenvironment (TME) markers by nodal status at diagnosis. The continuous lines show the OS of patients with immunohistochemistry (IHC) immune marker concentrations higher than the median, or positive mRNA expression levels for markers determined by *in situ* hybridization (ISH). The dashed lines show the OS when IHC immune marker concentrations were lower than the median, or when mRNA was not expressed for ISH markers. Significance levels for the log-rank test are indicated in the figures.

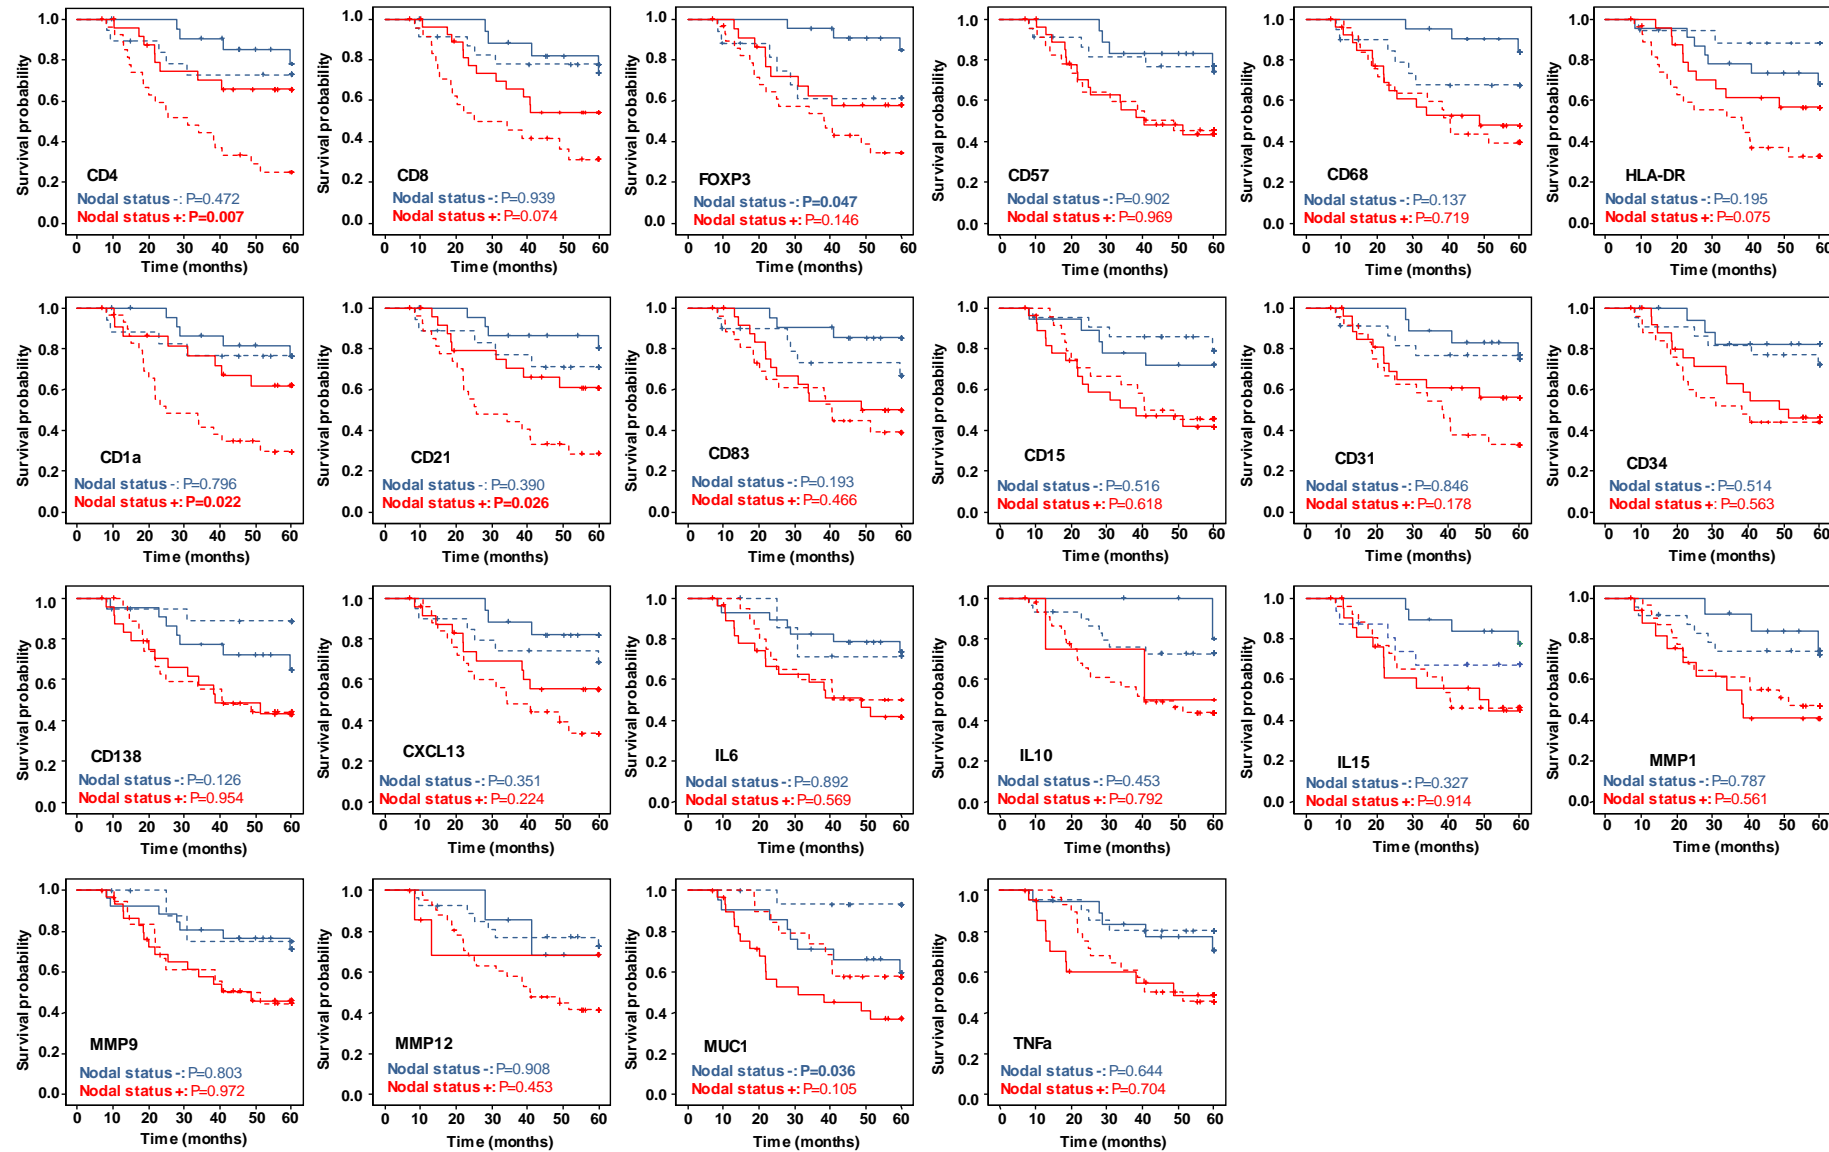

**Figure S5.** Superimposed Kaplan–Meier curves of five-year relapse-free survival (RFS) by tumor microenvironment (TME) markers by nodal status at diagnosis. The continuous lines show the RFS of patients with immunohistochemistry (IHC) immune marker concentrations higher than the median, or with positive mRNA expression levels for markers determined by *in situ* hybridization (ISH). The dashed lines show the RFS when IHC immune marker concentrations were lower than the median or when mRNA was not expressed for ISH markers. Significance levels for the log-rank test are indicated in the figures.

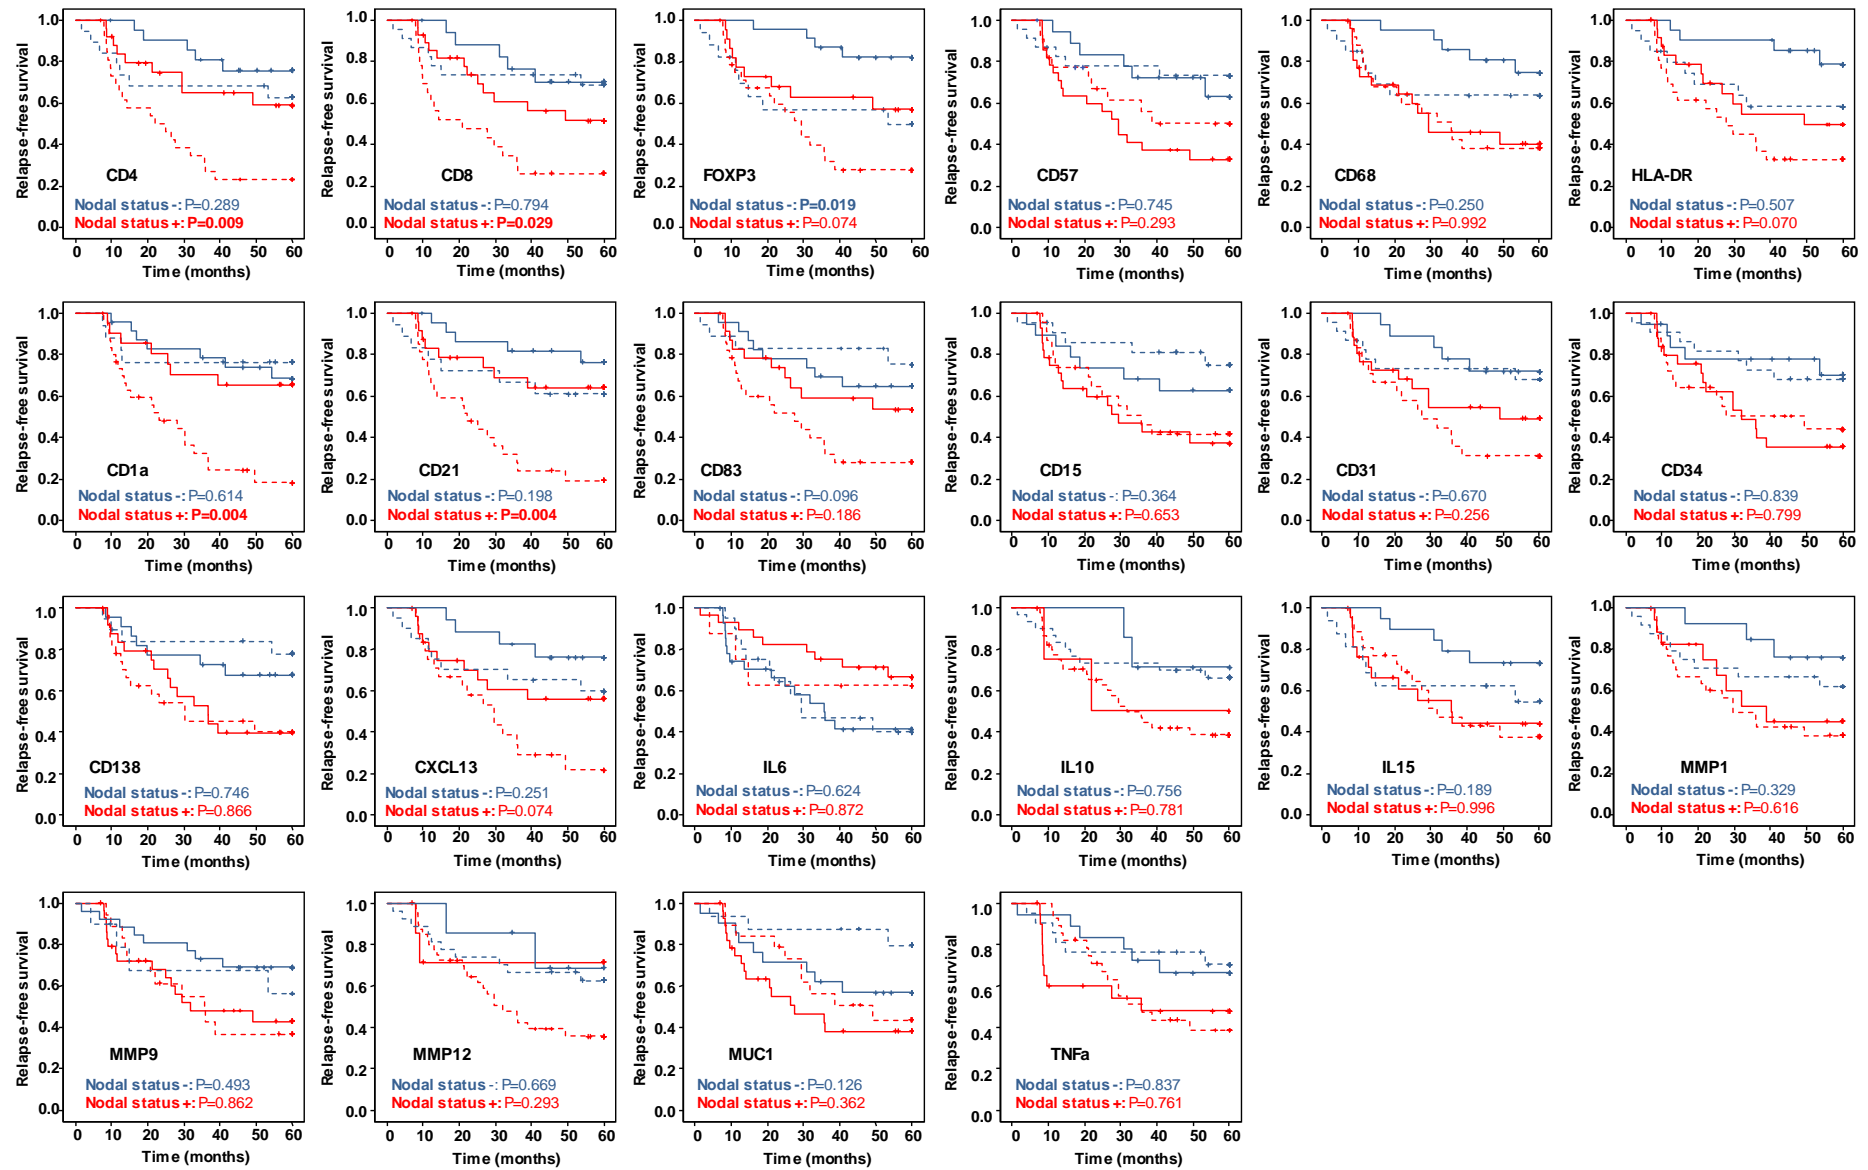

**Figure S6.** Superimposed Kaplan–Meier curves of five-year overall survival (OS) by tumor microenvironment (TME) markers by type of response. The continuous lines show the OS of patients with immunohistochemistry (IHC) immune markers concentrations higher than the median, or with positive mRNA expression levels for markers determined by *in situ* hybridization (ISH). The dashed lines show the OS when IHC immune markers concentrations were lower than the median or when mRNA was not expressed for ISH markers. Significance levels for the log-rank test are indicated in the figures.

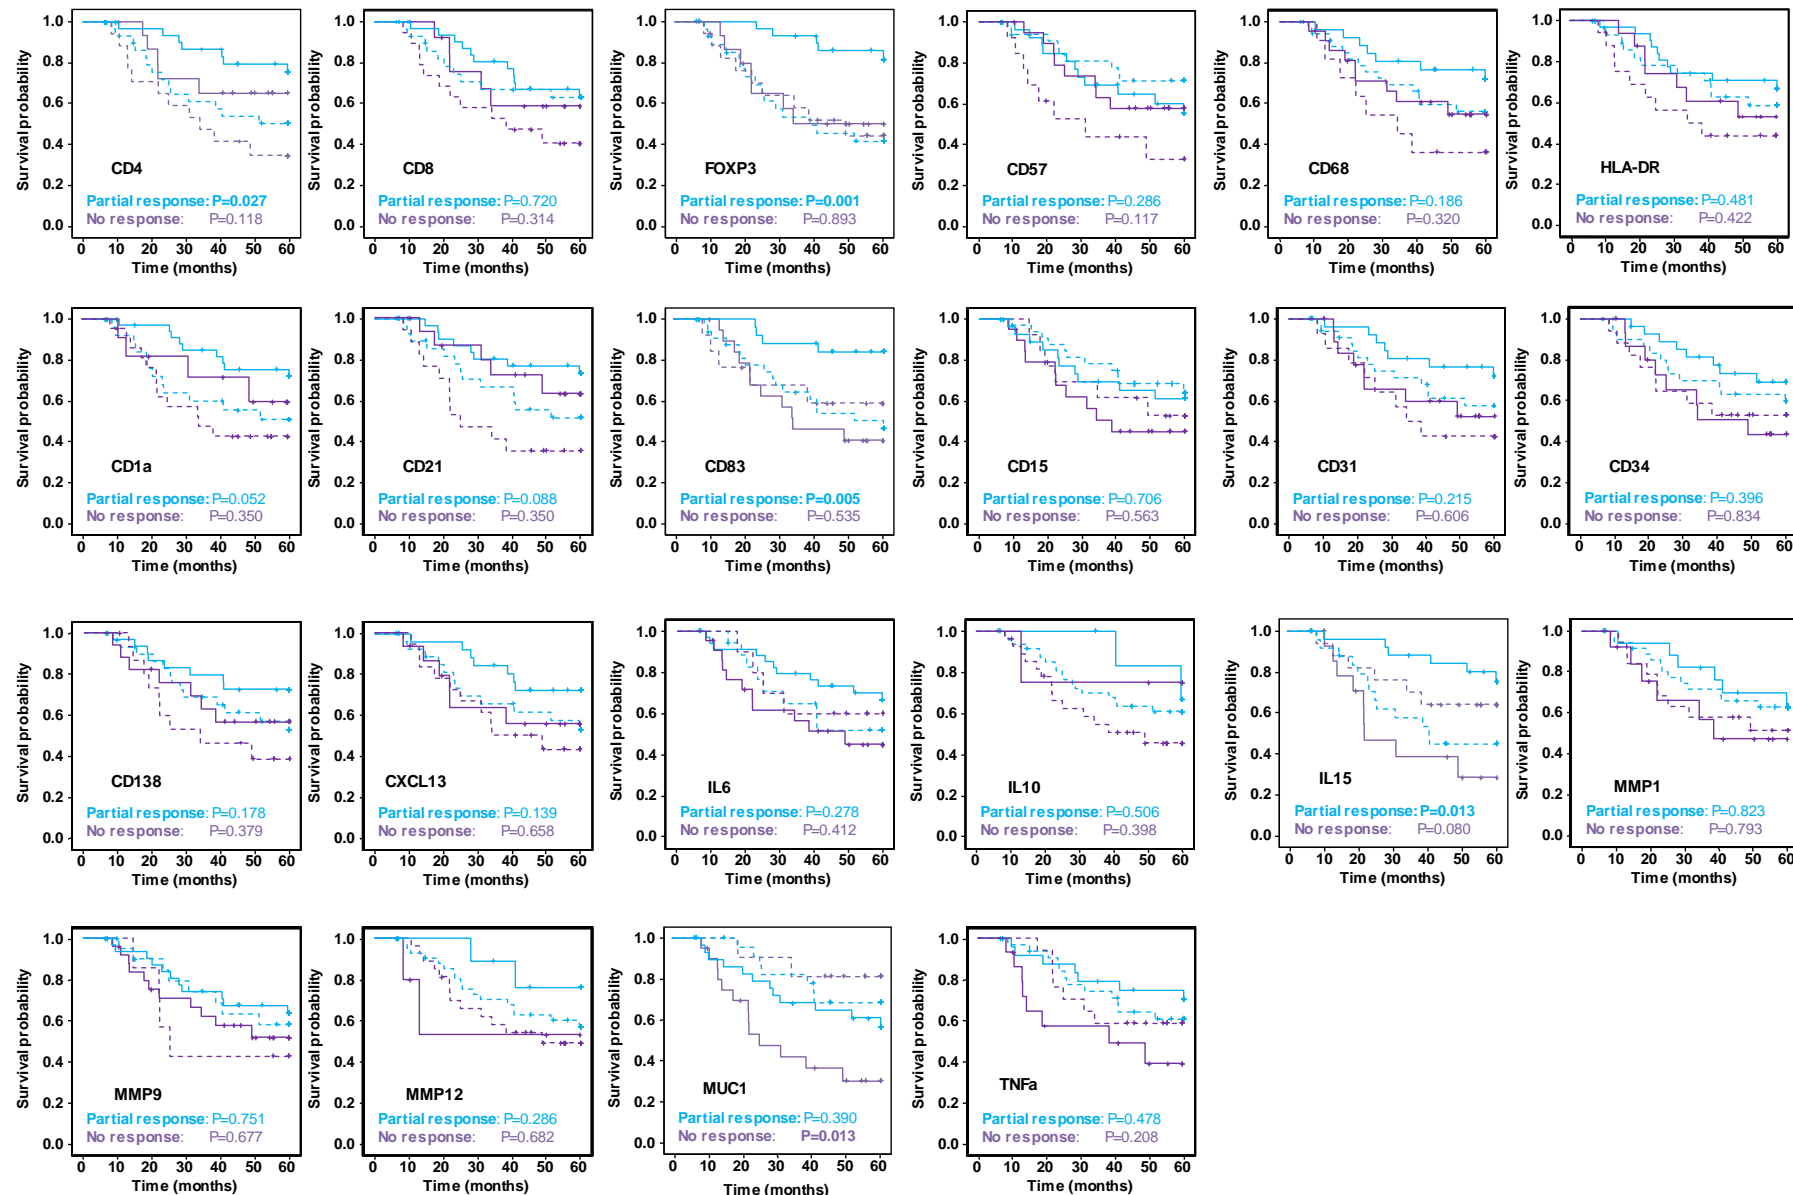



**Figure S7.** Superimposed Kaplan–Meier curves of five-year relapse-free survival (RFS) by tumor microenvironment (TME) markers by type of response. The continuous lines show the RFS of patients with immunohistochemistry (IHC) immune markers concentrations higher than the median, or with positive mRNA expression levels for markers determined by *in situ* hybridization (ISH). The dashed lines show the RFS when IHC immune markers concentrations were lower than the median or when mRNA was not expressed for ISH markers. Significance levels for the log-rank test are indicated in the figures.

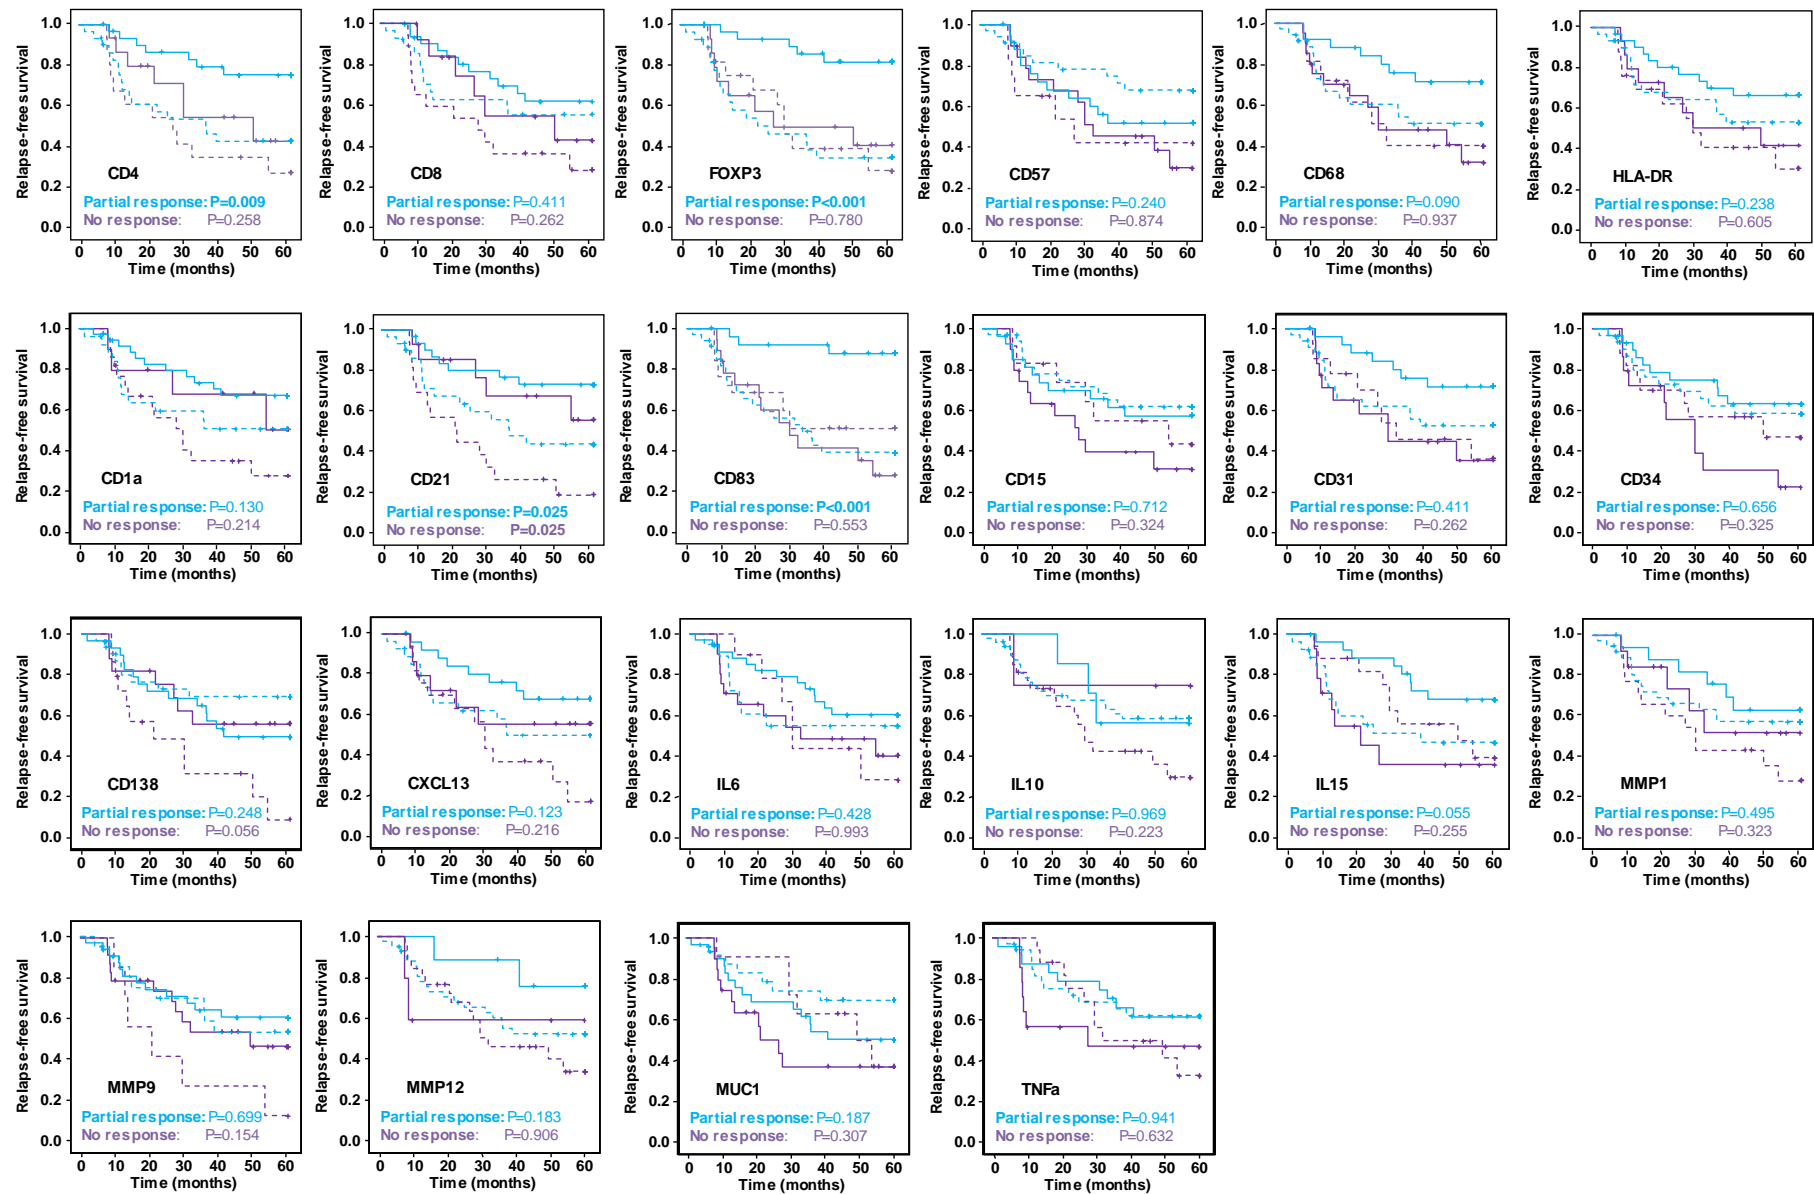

Supplement: s1 [file s1]
